# Supplementary material
Source: PubMed Central journal article supplement (PMC2890174)
Supplement: blood-2010-01-261396_1.pdf [file blood-2010-01-261396_1.pdf]

|                                                            | $\alpha 0-1 + \beta 16-17$ | SeMet $\alpha 0-1 +$<br>SeMet $\beta 16-17$ | $\alpha 0-1$ A99C + $\beta 16-17$ , EMP<br>Derivative      | $\alpha 0-1$ A131C + $\beta 16-17$ ,<br>EMP Derivative |
|------------------------------------------------------------|----------------------------|---------------------------------------------|------------------------------------------------------------|--------------------------------------------------------|
| <b>Data Collection</b>                                     |                            |                                             |                                                            |                                                        |
| Detector Type/Source                                       | MarCCD/APS                 | MarCCD/APS                                  | ADSC-Q315 CCD/NSLS                                         | ADSC-Q315 CCD/NSLS                                     |
| Wavelength (Å)                                             | 0.97872                    | 0.97872                                     | 1.00630                                                    | 1.00710                                                |
| Resolution <sup>a</sup>                                    | 40.0-2.80 (2.92-2.80)      | 40.0-3.50 (3.66-3.50)                       | 40.0-3.30 (3.36-3.30)                                      | 40.0-3.80 (3.87-3.80)                                  |
| Measured Reflections                                       | 54695 (6817)               | 44105 (5370)                                | 152440 (6182)                                              | 55224 (1747)                                           |
| Unique Reflections                                         | 18015 (2195)               | 9318 (1089)                                 | 11245 (552)                                                | 7360 (364)                                             |
| Completeness                                               | 98.6 (99.3)                | 99.7 (100.0)                                | 100.0 (100.0)                                              | 99.3 (94.1)                                            |
| Multiplicity                                               | 3.0 (3.1)                  | 4.7 (4.9)                                   | 13.6 (11.2)                                                | 7.5 (4.8)                                              |
| Intensity (I/ $\sigma$ )                                   | 13.5 (3.4)                 | 17.5 (5.2)                                  | 30.7 (3.2)                                                 | 25.8 (2.4)                                             |
| R <sub>sym</sub> (%) <sup>b</sup>                          | 5.7 (29.7)                 | 5.9 (28.2)                                  | 12.1 (87.9)                                                | 14.4 (83.4)                                            |
| R <sub>meas</sub> (%) <sup>c</sup>                         | 7.0 (35.8)                 | 7.5 (35.7)                                  | –                                                          | –                                                      |
| <b>Phasing<sup>d</sup></b>                                 |                            |                                             |                                                            |                                                        |
| Resolution                                                 | 25.0-2.80                  | 25.0-3.50                                   | 25.0-3.30                                                  | 25.0-3.80                                              |
| Phasing Power <sub>isomorphous</sub><br>(acentric/centric) | –                          | 0.651/0.629                                 | 0.565/0.552                                                | 0.400/0.511                                            |
| Phasing Power <sub>anomalous</sub>                         | –                          | 0.848                                       | 0.503                                                      | 0.190                                                  |
| R <sub>cutlis-anomalous</sub><br>(acentric/centric)        | –                          | 0.799/0.923                                 | 0.853/0.859                                                | 0.867/0.831                                            |
| R <sub>cutlis-isomorphous</sub>                            | –                          | 0.898                                       | 0.965                                                      | 0.998                                                  |
| FOM (acentric/centric)                                     | –                          | 0.20/0.22                                   | Together with SeMet HE $\alpha$ 01 + SeMet HE $\beta$ 1617 |                                                        |
| <b>Refinement</b>                                          |                            |                                             |                                                            |                                                        |
| Resolution                                                 | 35.0-2.80 (2.87-2.80)      |                                             |                                                            |                                                        |
| Number of Reflections<br>working/test                      | 17085/922<br>(1251/76)     |                                             |                                                            |                                                        |
| R-factor (%) <sup>e</sup>                                  | 26.8 (40.9)                |                                             |                                                            |                                                        |
| R-free (%) <sup>f</sup>                                    | 29.9 (40.5)                |                                             |                                                            |                                                        |
| Protein Atoms                                              | 2673                       |                                             |                                                            |                                                        |
| Bond lengths                                               | 0.011                      |                                             |                                                            |                                                        |
| Bond angles                                                | 1.235                      |                                             |                                                            |                                                        |

<sup>a</sup>Numbers in parenthesis correspond to the highest resolution shell throughout.

<sup>b</sup> $R_{sym} = \sum |I - \langle I \rangle| / \sum I$ , where  $I$  is the observed intensity and  $\langle I \rangle$  the average intensity obtained from multiple measurements.

<sup>c</sup>R<sub>meas</sub> as described in Diederichs and Karplus.

<sup>d</sup>Extracted from autoSHARP log files.

<sup>e</sup>R-factor =  $\sum |F_o| - |F_c| / \sum |F_o|$ , where  $|F_o|$  is the observed structure factor amplitude and  $|F_c|$  the calculated structure factor amplitude.

<sup>f</sup>R<sub>free</sub>: R-factor based on 5% of the data excluded from refinement.

Note: Data collection statistics for native and seleno-methionine datasets were extracted from SCALA log files. Data collection statistics for mercury derivative datasets were extracted from HKL2000 log files.
